# Supplementary material for: Mortality of Children with Autism Spectrum Disorder Using Data from a Large-Scale Korean National Cohort
Source: PubMed Central journal article supplement — Yonsei Med J. 2021 Sep 10;62(10):943–7. doi: 10.3349/ymj.2021.62.10.943 (PMC8470567; doi:10.3349/ymj.2021.62.10.943), 2021-09-10
Supplement: ymj-62-943-s001.pdf [file ymj-62-943-s001.pdf]

**Supplementary Table 1.** Sociodemographic Characteristics of Children Who Participated in the First Health Screening and Those Who Did not Participate

| Characteristics       | Total<br>(n=3598904) | Children who participated in the first<br>health screening (n=2023863) | Children who did not participate in the first<br>health screening (n=1575041) | <i>p</i> value |
|-----------------------|----------------------|------------------------------------------------------------------------|-------------------------------------------------------------------------------|----------------|
| Birth year            |                      |                                                                        |                                                                               | <0.001         |
| 2007                  | 481425 (13.4)        | 104652 (5.2)                                                           | 376773 (23.9)                                                                 |                |
| 2008                  | 454636 (12.6)        | 222324 (11.0)                                                          | 232312 (14.8)                                                                 |                |
| 2009                  | 430082 (11.9)        | 229168 (11.3)                                                          | 200914 (12.8)                                                                 |                |
| 2010                  | 453177 (12.6)        | 258392 (12.8)                                                          | 194785 (12.4)                                                                 |                |
| 2011                  | 456078 (12.7)        | 269430 (13.3)                                                          | 186648 (11.8)                                                                 |                |
| 2012                  | 470374 (13.1)        | 311640 (15.4)                                                          | 158734 (10.1)                                                                 |                |
| 2013                  | 425805 (11.8)        | 302202 (14.9)                                                          | 123603 (7.8)                                                                  |                |
| 2014                  | 427327 (11.9)        | 326055 (16.1)                                                          | 101272 (6.4)                                                                  |                |
| Sex                   |                      |                                                                        |                                                                               | <0.001         |
| Boys                  | 1850801 (51.4)       | 1044496 (51.6)                                                         | 806305 (51.2)                                                                 |                |
| Girls                 | 1748103 (48.6)       | 979367 (48.4)                                                          | 768736 (48.8)                                                                 |                |
| Household income      |                      |                                                                        |                                                                               | <0.001         |
| High (15–20 ventile)  | 1269815 (35.3)       | 715508 (35.3)                                                          | 554307 (35.2)                                                                 |                |
| Middle (7–14 ventile) | 1807260 (50.2)       | 1039685 (51.4)                                                         | 767575 (48.7)                                                                 |                |
| Low (0–6 ventile)     | 521829 (14.5)        | 268670 (13.3)                                                          | 253159 (16.1)                                                                 |                |

Data are presented as a n (%).
