# Supplementary material for: Mortality of Children with Autism Spectrum Disorder Using Data from a Large-Scale Korean National Cohort
Source: PubMed Central journal article supplement — Yonsei Med J. 2021 Sep 10;62(10):943–7. doi: 10.3349/ymj.2021.62.10.943 (PMC8470567; doi:10.3349/ymj.2021.62.10.943), 2021-09-10
Supplement: ymj-62-943-s003.pdf [file ymj-62-943-s003.pdf]

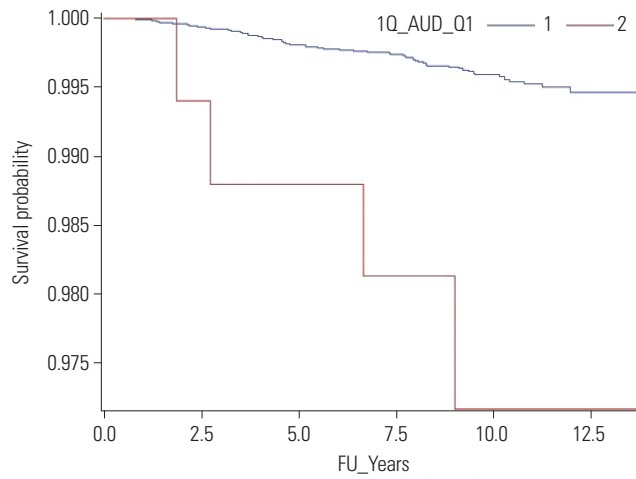

**Supplementary Fig. 2.** Kaplan-Meier survival curve displaying the association between hearing impairment detected in infancy (4–6 months of age) and mortality among children diagnosed with autism spectrum disorder.
